# Supplementary material for: Phase 1/2 study of alectinib in RET-rearranged previously-treated non-small cell lung cancer (ALL-RET)
Source: PubMed Central journal article supplement — Transl Lung Cancer Res. 2021 Jan;10(1):314–25. doi: 10.21037/tlcr-20-549 (PMC7867784; doi:10.21037/tlcr-20-549), 2021-01
Supplement: tlcr-10-01-314-dss.pdf [file tlcr-10-01-314-dss.pdf]

## Data Sharing Statement

|                     |                                                                                                                                                     |                                                               |
|---------------------|-----------------------------------------------------------------------------------------------------------------------------------------------------|---------------------------------------------------------------|
| <b>Article Info</b> | <a href="http://dx.doi.org/10.21037/tlcr-20-549">http://dx.doi.org/10.21037/tlcr-20-549</a>                                                         |                                                               |
| <b>Item</b>         | <b>Question</b>                                                                                                                                     | <b>Authors' Response<br/>(place - if not applicable)</b>      |
| 1                   | Would you like to share data collected for your study to others?                                                                                    | No.                                                           |
| 2                   | If not, would you like to share the reason for your decision?                                                                                       | Because the protocol did not allow to share data with others. |
| 3                   | What data in particular will be shared?                                                                                                             | -                                                             |
| 4                   | Any other documents will be shared? Such as study protocol, statistical analysis plan, informed consent form, clinical study report, analytic code. | -                                                             |
| 5                   | When will data availability begin?                                                                                                                  | -                                                             |
| 6                   | When will data availability end?                                                                                                                    | -                                                             |
| 7                   | To whom will you share the data?                                                                                                                    | -                                                             |
| 8                   | For what type of analysis or purpose?                                                                                                               | -                                                             |
| 9                   | How or where can the data/documents be obtained?                                                                                                    | -                                                             |
| 10                  | Any other restrictions?                                                                                                                             | -                                                             |
