# Supplementary material for: Phase 1/2 study of alectinib in RET-rearranged previously-treated non-small cell lung cancer (ALL-RET)
Source: PubMed Central journal article supplement — Transl Lung Cancer Res. 2021 Jan;10(1):314–25. doi: 10.21037/tlcr-20-549 (PMC7867784; doi:10.21037/tlcr-20-549), 2021-01
Supplement: tlcr-10-01-314-supplementary.pdf [file tlcr-10-01-314-supplementary.pdf]

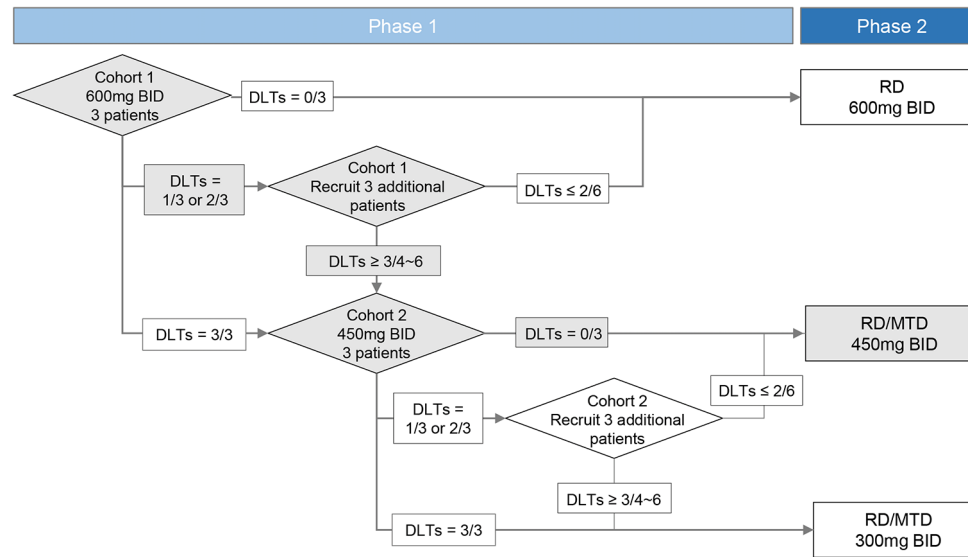

**Figure S1** Study design. Grey areas indicate actual outcome and dose reduction of this study. BID, administered twice daily; DLTs, dose limiting toxicities; RD, recommended dose; MTD, maximum tolerated dose. This figure was from the reference (25).

**Table S1** List of patients in phase 1

| Cohort<br>(alectinib dose) | Case | Age | Sex | Smoking<br>status | Type of RET<br>fusion | PS | Body<br>weight (kg) | Previous RET-TKI<br>treatment | Previous ICI<br>treatment | No. of previous<br>regimens | DLTs                                         |
|----------------------------|------|-----|-----|-------------------|-----------------------|----|---------------------|-------------------------------|---------------------------|-----------------------------|----------------------------------------------|
| Cohort 1<br>(600 mg BID)   | S1-1 | 53  | F   | Never             | KIF5B- RET            | 0  | 67                  | –                             | –                         | 2                           | –                                            |
|                            | S1-2 | 64  | F   | Former            | KIF5B- RET            | 1  | 45                  | Vandetanib                    | –                         | 3                           | –                                            |
|                            | S1-3 | 47  | F   | Never             | KIF5B- RET            | 1  | 60                  | –                             | Nivolumab                 | 5                           | Rash, AST increased                          |
|                            | S1-4 | 39  | F   | Never             | KIF5B- RET            | 1  | 55                  | –                             | Nivolumab                 | 8                           | Erythema multiforme,<br>Thromboembolic event |
|                            | S1-5 | 61  | F   | Never             | KIF5B- RET            | 1  | 46                  | Vandetanib                    | –                         | 3                           | –                                            |
|                            | S1-6 | 73  | M   | Former            | Unknown               | 1  | 54                  | –                             | –                         | 2                           | CPK Increased                                |
| Cohort 2<br>(450 mg BID)   | S1-7 | 68  | F   | Never             | KIF5B- RET            | 0  | 58                  | –                             | –                         | 1                           | –                                            |
|                            | S1-8 | 58  | M   | Never             | KIF5B- RET            | 0  | 53                  | –                             | –                         | 4                           | –                                            |
|                            | S1-9 | 75  | M   | Former            | KIF5B- RET            | 0  | 63                  | –                             | –                         | 2                           | –                                            |

PS, performance status; ICI, immune checkpoint inhibitor; DLTs, dose-limiting toxicities; F, female; M, male.

**Table S2** List of patients in phase 2

| Case  | Age | Sex | Smoking status | Type of RET fusion | ECOG PS | Body weight | Previous RET-TKI treatment | Previous ICI treatment | Number of previous regimens |
|-------|-----|-----|----------------|--------------------|---------|-------------|----------------------------|------------------------|-----------------------------|
| S2-1  | 69  | M   | Former         | KIF5B-RET          | 1       | 48          | -                          | -                      | 1                           |
| S2-2  | 67  | F   | Never          | Unknown            | 1       | 48          | -                          | -                      | 2                           |
| S2-3  | 66  | F   | Never          | KIF5B-RET          | 1       | 56          | -                          | -                      | 3                           |
| S2-4  | 47  | F   | Never          | CCDC6-RET          | 1       | 59          | Vandetanib, lenvatinib     | -                      | 5                           |
| S2-5  | 36  | M   | Never          | CCDC6-RET          | 1       | 56          | -                          | Avelumab               | 3                           |
| S2-6  | 61  | M   | Former         | KIF5B-RET          | 1       | 87          | -                          | -                      | 1                           |
| S2-7  | 46  | M   | Former         | KIF5B-RET          | 0       | 82          | -                          | -                      | 1                           |
| S2-8  | 52  | M   | Never          | Unknown            | 0       | 70          | -                          | -                      | 1                           |
| S2-9  | 67  | F   | Former         | CCDC6-RET          | 0       | 75          | -                          | -                      | 2                           |
| S2-10 | 33  | F   | Never          | KIF5B-RET          | 1       | 54          | -                          | -                      | 1                           |
| S2-11 | 44  | M   | Former         | CCDC6-RET          | 0       | 73          | Vandetanib, lenvatinib     | -                      | 5                           |
| S2-12 | 46  | F   | Never          | KIF5B-RET          | 0       | 73          | -                          | -                      | 2                           |
| S2-13 | 54  | F   | Never          | Unknown            | 1       | 62          | -                          | -                      | 3                           |
| S2-14 | 30  | M   | Never          | CCDC6-RET          | 1       | 65          | -                          | -                      | 3                           |
| S2-15 | 39  | F   | Never          | KIF5B-RET          | 1       | 69          | -                          | -                      | 2                           |
| S2-16 | 44  | F   | Former         | CCDC6-RET          | 0       | 57          | -                          | -                      | 1                           |
| S2-17 | 78  | F   | Never          | KIF5B-RET          | 1       | 52          | -                          | -                      | 2                           |
| S2-18 | 59  | F   | Never          | KIF5B-RET          | 0       | 80          | -                          | Nivolumab              | 3                           |
| S2-19 | 30  | M   | Former         | CCDC6-RET          | 1       | 90          | -                          | -                      | 2                           |
| S2-20 | 34  | M   | Former         | KIF5B-RET          | 0       | 86          | -                          | Pembrolizumab          | 2                           |
| S2-21 | 57  | F   | Former         | CCDC6-RET          | 0       | 41          | Vandetanib                 | -                      | 4                           |
| S2-22 | 70  | F   | Never          | KIF5B-RET          | 1       | 51          | -                          | Pembrolizumab          | 2                           |
| S2-23 | 53  | M   | Never          | KIF5B-RET          | 1       | 63          | -                          | -                      | 3                           |
| S2-24 | 37  | F   | Never          | KIF5B-RET          | 0       | 55          | -                          | Nivolumab              | 3                           |
| S2-25 | 44  | M   | Never          | CCDC6-RET          | 1       | 63          | -                          | Nivolumab              | 5                           |

PS, performance status; ICI, immune checkpoint inhibitor; M, male; F, female.

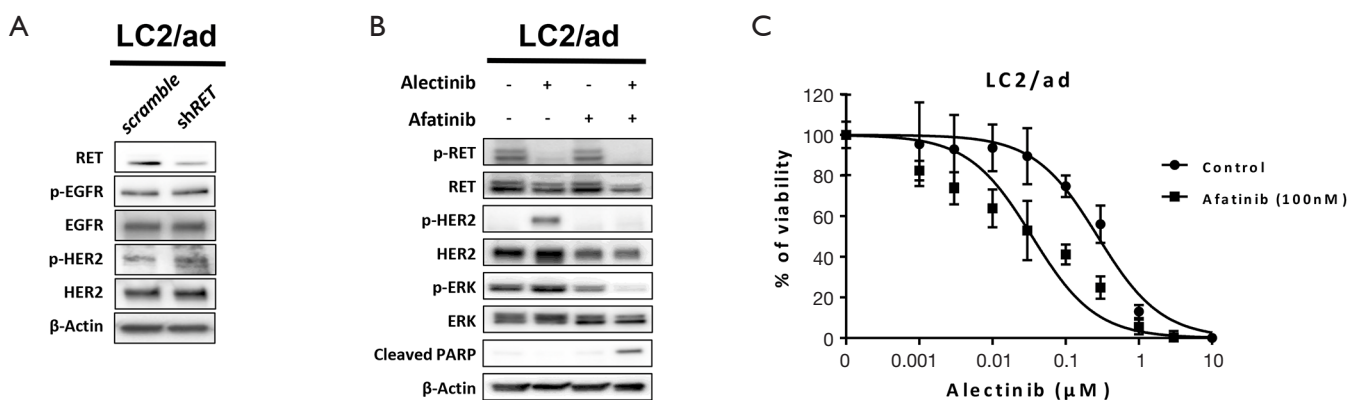

**Figure S2** Alectinib exposure induced activation of HER2 in the RET-fusion positive NSCLC cell line LC2/ad. (A) Western blotting of LC2/ad cells treated with shRNA targeting RET. (B) Protein expression by western blotting in LC2/ad cells treated with alectinib (1 μmol/L) and/or afatinib (100 nmol/L) for 72 h. (C) Cell viability determined by MTT assay in LC2/ad cells after 72 h treatment with combination of alectinib and afatinib. Data shown are representative of at least three independent experiments. The data shown are the mean ± SD of triplicate cultures. RET, rearranged during transfection; NSCLC, non-small cell lung cancer.
